# Supplementary material for: Nanocomposite of graphene based sensor for paraquat: Synergetic effect of nano-gold and ionic liquids on electrocatalysis
Source: Royal Society of Chemistry journal article supplement (doi:10.1039/c2ay25795e), 2012-01-01
Supplement: c2ay25795e.pdf [file c2ay25795e.pdf]

# Nanocomposite of graphene based sensor for paraquat: synergetic effect of nano-gold and ionic liquids on electrocatalysis

Fei Cui, Lin Chu, Xiaoli Zhang\*

School of Chemistry and Chemical Engineering, Shandong University,  
Jinan 250100, China

\*Corresponding author. Email: zhangxl@sdu.edu.cn

Tel: +86-531-88361318. Fax: +86-531-88564464

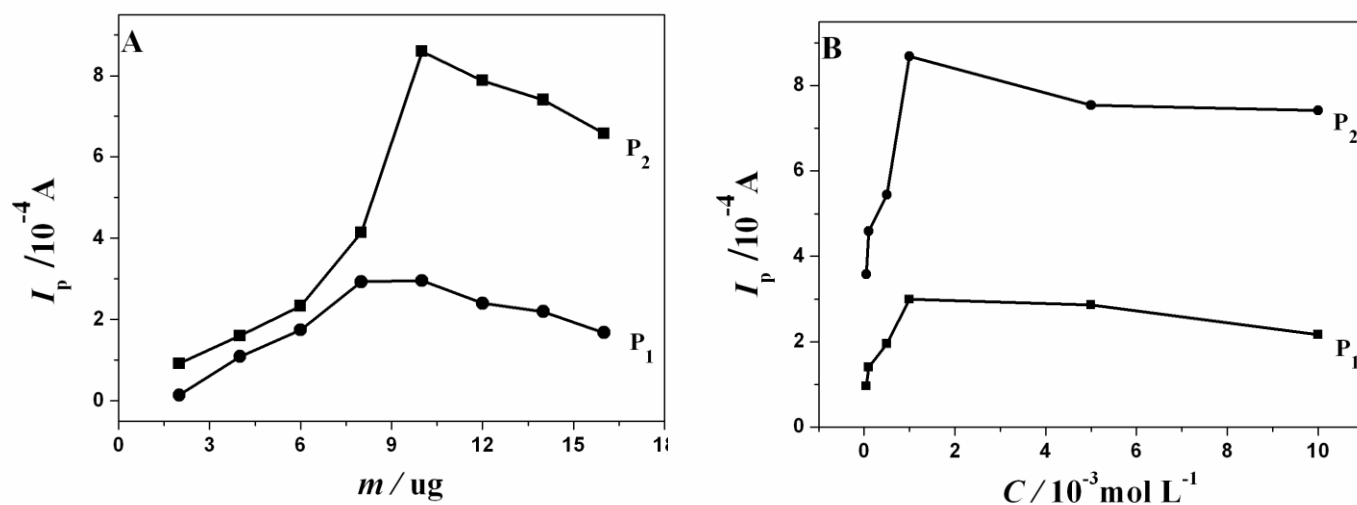

**Fig. A.1** (A) The influence of amounts of modified GR/Au nanocomposites on the peak height of  $1.0 \times 10^{-4}$  mol  $\text{L}^{-1}$  PQ. (B) The influence of concentration of ILs on the peak height of  $1.0 \times 10^{-4}$  mol  $\text{L}^{-1}$  PQ.

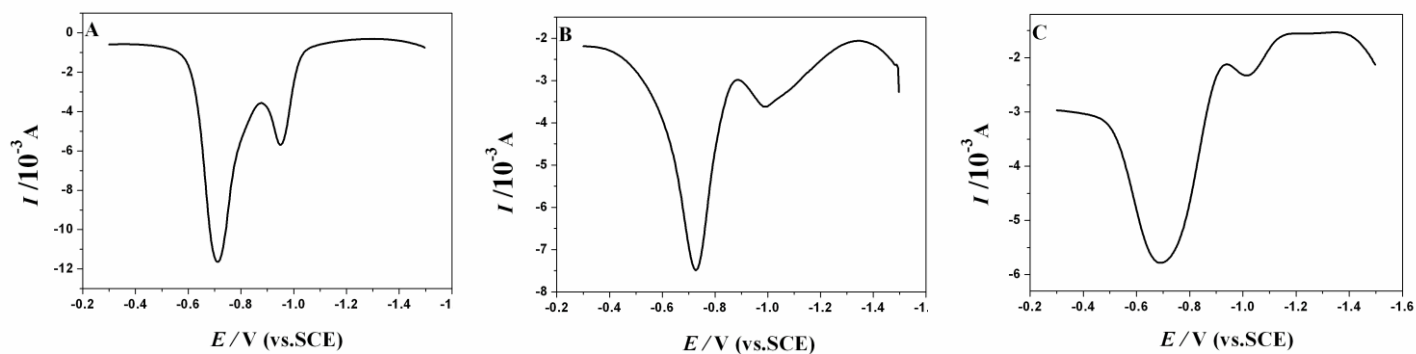

**Fig. A.2** The square wave voltammetric curve of  $1.0 \times 10^{-4} \text{ mol L}^{-1}$  PQ at GR/Au/ILs/GCE by using (A) PB, (B) acetate buffer and (C) potassium sulphate buffer as the supporting electrolytes.

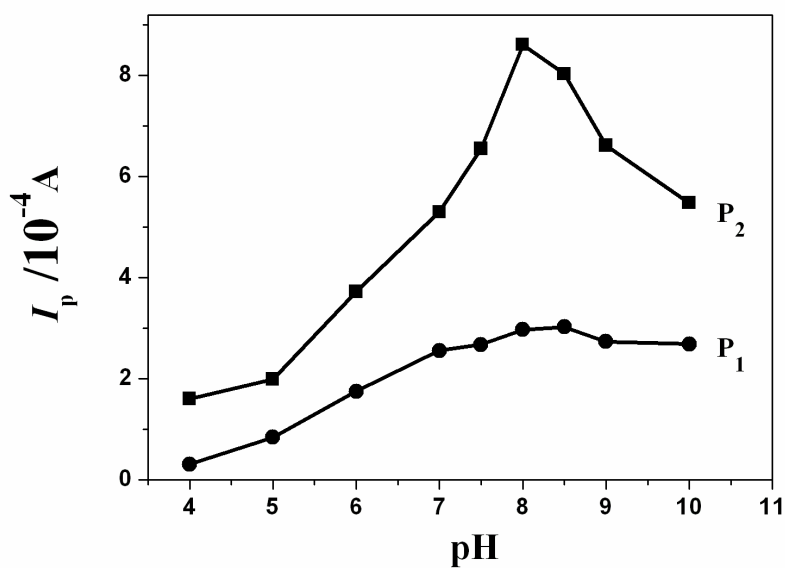

**Fig. A.3** The influence of pH on the peak height of  $1.0 \times 10^{-4} \text{ mol L}^{-1}$  PQ.

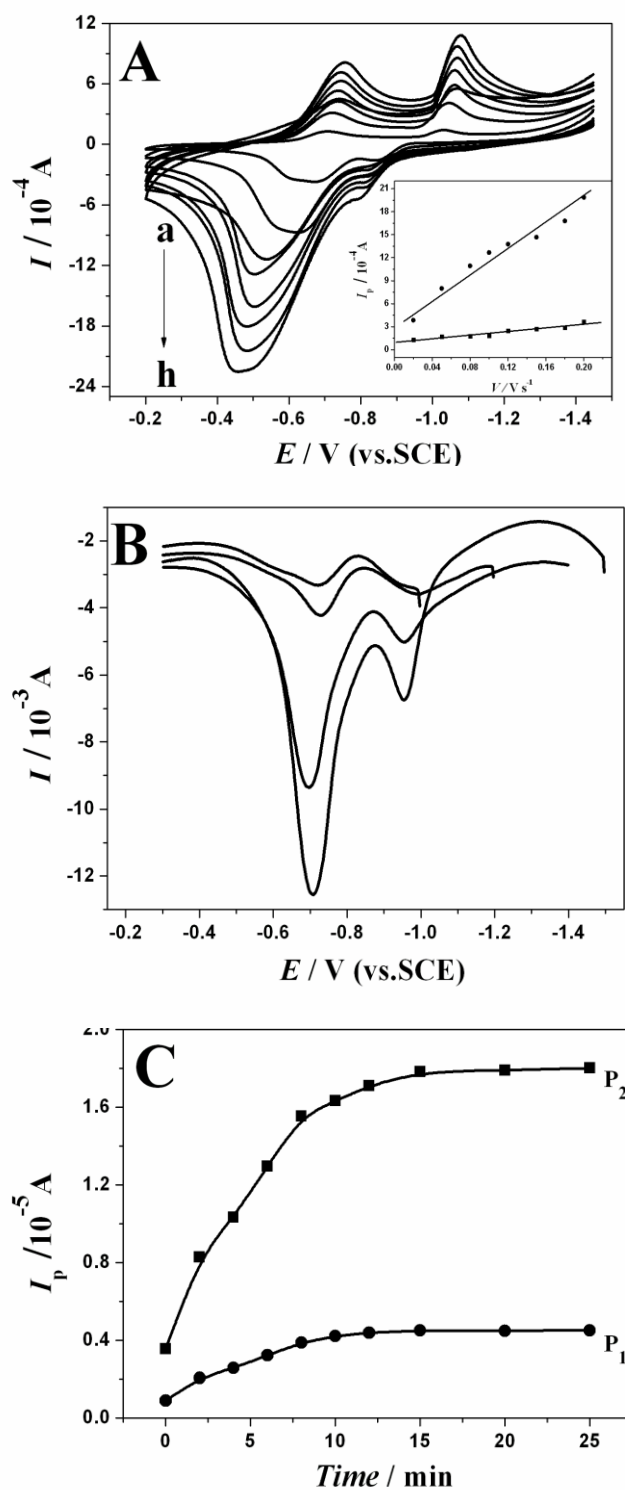

**Fig. A.4** (A) CVs of GR/Au/ILs/GCE in the presence of  $1.0 \times 10^{-4} \text{ mol L}^{-1}$  PQ at different scan rate (a→h): 0.02, 0.05, 0.08, 0.1, 0.12, 0.15, 0.18, 0.2  $\text{V s}^{-1}$ . Inset: The relation between the peak heights of PQ versus the scan rate. (B) The square wave voltammetric curve of  $1.0 \times 10^{-4} \text{ mol L}^{-1}$  PQ at GR/Au/ILs/GCE under the different accumulation potential. From inner to outer: -1.0 V, -1.2 V, -1.4 V, -1.5 V. (C) The influence of the accumulation time on the peak height of  $5.0 \times 10^{-7} \text{ mol L}^{-1}$  PQ.

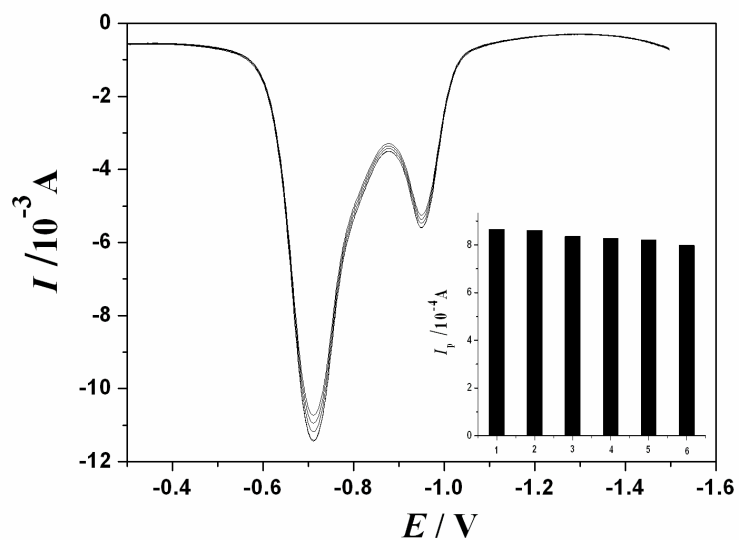

**Fig. A.5** Repeated square wave voltammetric curve of  $1.0 \times 10^{-4}$  mol L<sup>-1</sup> PQ at GR/Au/ILs/GCE after accumulation for 10 min. Inset: the peak height of PQ from 1 to 6 cycles.

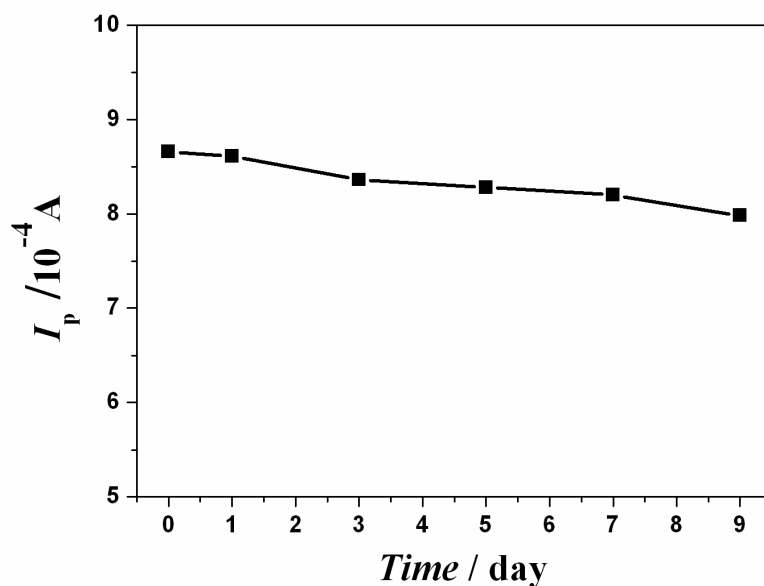

**Fig. A.6** The peak height of PQ at GR/Au/ILs/GCE after storing this electrode in 4°C constant temperature over a 9-day period.
